## Correction: LRP6 promotes invasion and metastasis of colorectal cancer through cytoskeleton dynamics

Qian Yao<sup>1,\*</sup>, Yu An<sup>1,\*</sup>, Wei Hou<sup>1</sup>, Ya-Nan Cao<sup>1</sup>, Meng-Fei Yao<sup>1</sup>, Ning-Ning Ma<sup>1</sup>, Lin Hou<sup>1</sup>, Hong Zhang<sup>2</sup>, Hai-Jing Liu<sup>1</sup> and Bo Zhang<sup>1</sup>

<sup>1</sup>Department of Pathology, School of Basic Medical Sciences, Peking University Health Science Center, Beijing 100191, China

<sup>2</sup>Department of Pathology, Beijing Tongren Hospital, Capital Medical University, Beijing 100730, China

\*These authors have contributed equally to this work

**Published:** August 11, 2020

**Copyright:** Yao et al. This is an open-access article distributed under the terms of the Creative Commons Attribution License 3.0 (CC BY 3.0), which permits unrestricted use, distribution, and reproduction in any medium, provided the original author and source are credited.

**This article has been corrected:** The Funding information has been updated as follows:

### FUNDING

This project was supported by the National Natural Science Foundation of China (No. 81101998, No. 81372292 and No. 81502493).

Original article: Oncotarget. 2017; 8:109632–109645. <https://doi.org/10.18632/oncotarget.22759>
